# Supplementary material for: Higher primate-like direct corticomotoneuronal connections are transiently formed in a juvenile subprimate mammal
Source: PubMed Central journal article supplement (PMC6224497; doi:10.1038/s41598-018-34961-z), 2018-11-08
Supplement: 41598_2018_34961_MOESM1_ESM.pdf [file 41598_2018_34961_MOESM1_ESM.pdf]

Higher primate-like direct corticomotoneuronal connections are transiently formed  
in a juvenile subprimate mammal

**Authors:** Naoyuki Murabe<sup>1</sup>, Takuma Mori<sup>2, 6</sup>, Satoshi Fukuda<sup>1</sup>, Noriko Isoo<sup>1</sup>, Takae Ohno<sup>1</sup>,  
Hiroaki Mizukami<sup>3</sup>, Keiya Ozawa<sup>3, 4</sup>, Yumiko Yoshimura<sup>2, 5</sup> and Masaki Sakurai<sup>1\*</sup>

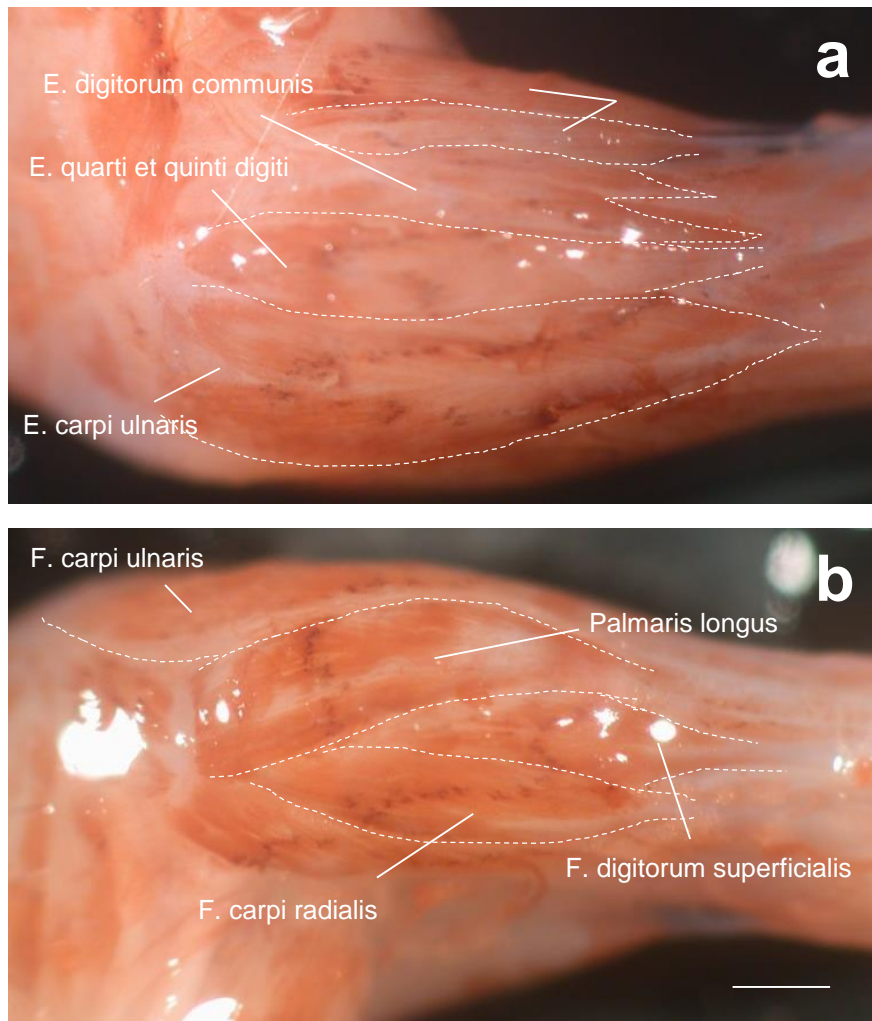

**Supplementary Fig. S1. Distribution of the neuromuscular junctions in the forearm muscles.** Neuromuscular junctions in the lateral (**a**) and medial (**b**) aspects of the right forearm of P5 mice visualized using acetylcholinesterase histochemistry. Scale bar, 1 mm.

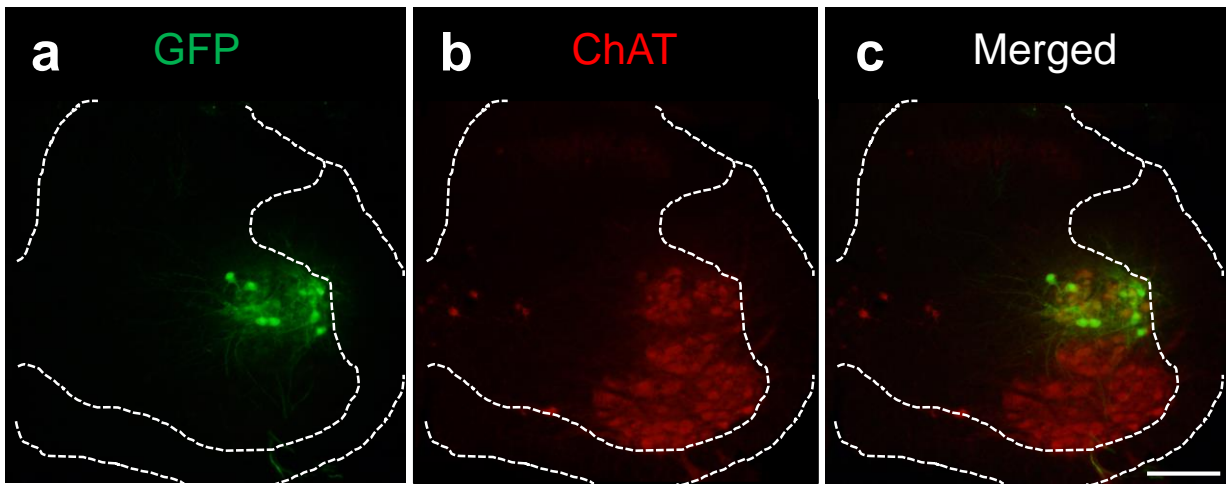

**Supplementary Fig. S2. Injection of RV- $\Delta$ G-GFP alone into the forearm muscles on P7 labeled only the forearm MNs on P14.**

(a) Retrogradely labeled GFP-positive cells, (b) Anti-choline acetyl transferase (ChAT) immunolabeling showing MNs, (c) Merged image. Bar, 200  $\mu$ m.

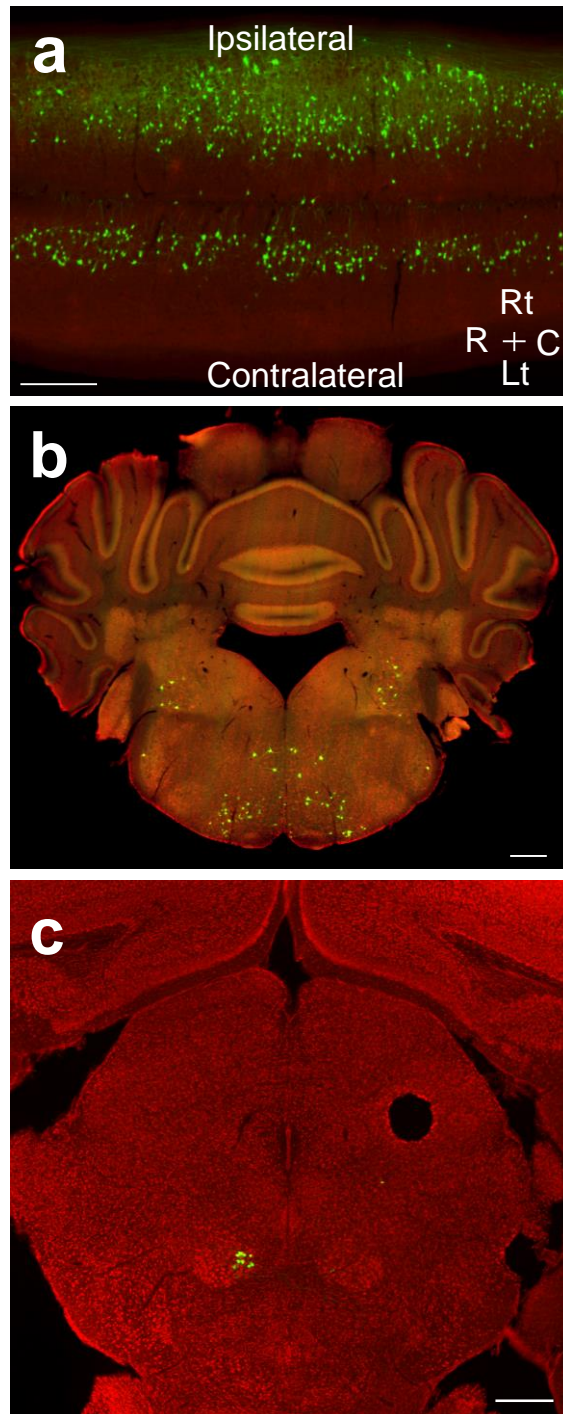

**Supplementary Fig. S3. Monosynaptic tracing from forearm MNs showing the GFP-labeled neurons in the cervical spinal cord and brain stem.**

(a) Example of a horizontal section of cervical spinal cord showing transsynaptically-labeled neurons. Examples of a coronal sections in the medulla oblongata (b) and red nucleus (c) showing transsynaptically labeled-neurons after monosynaptic tracing. Animals were received intramuscular injection of RV- $\Delta$ G-GFP and AAV6-RFP-f2A-G on P5-6 and sacrificed on P14. Red, a fluorescent Nissl staining by Neurotrace Red (b, c). Scale bar, 500  $\mu$ m. C, caudal, R, rostral, Lt, left, Rt, right.

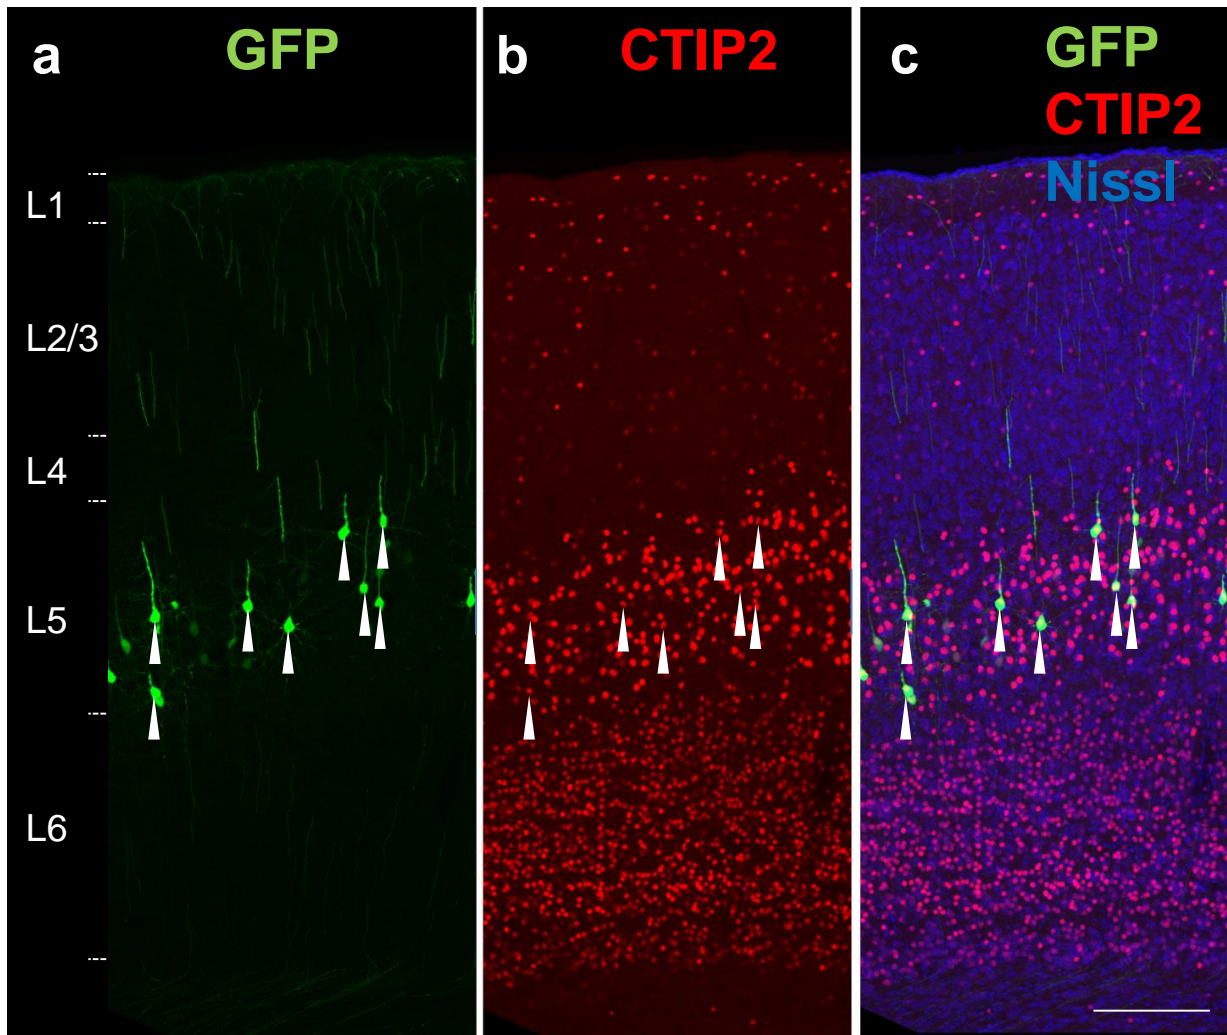

**Supplementary Fig. S4. Identities of the cortical premotor neurons.**

GFP-labeled neurons in P14 cortex after monosynaptic tracing from forearm MNs located in the layer V (a), all of which expressed CTIP2 that is preferentially expressed in the corticospinal neurons in the layer V (b). (c) Merged image with Neurotrace Red staining (blue, fluorescent Nissl staining) showing laminar structure of the cortex. Arrowheads, examples of double positive cells. Bar, 200  $\mu\text{m}$ .

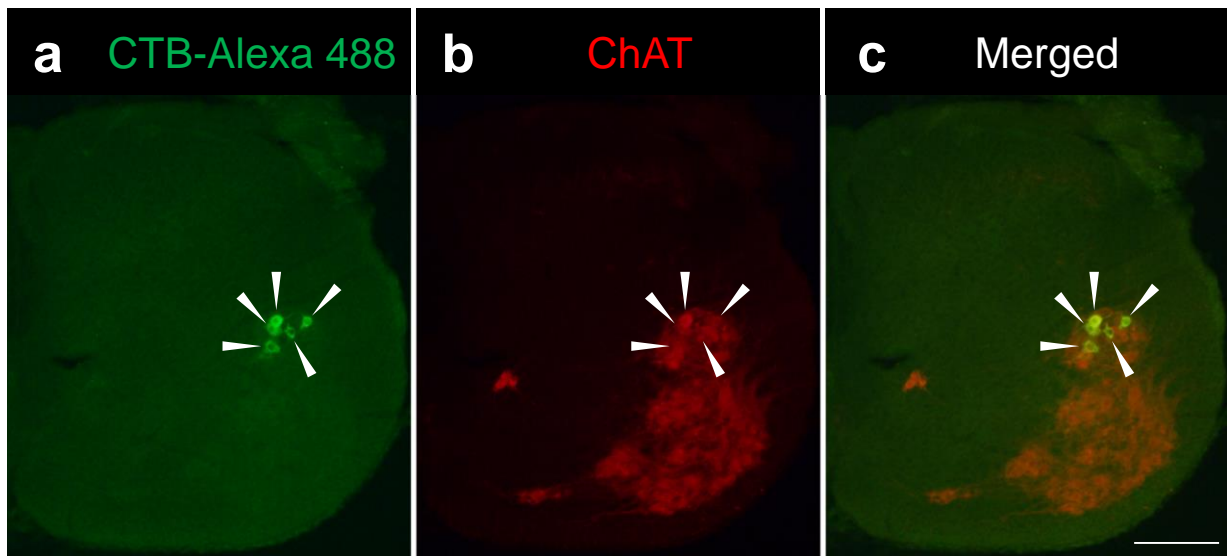

**Supplementary Fig. S5. Retrogradely labeled cells with CTB-Alexa 488 from the forearm muscles were all ChAT-positive in the cervical cord.**

(a) CTB-Alexa 488, (b) Anti-ChAT immunolabeling showing MNs, (c) Merged image. Arrowheads, CTB-Alexa 488 labeled cells. Bar, 200  $\mu\text{m}$ .

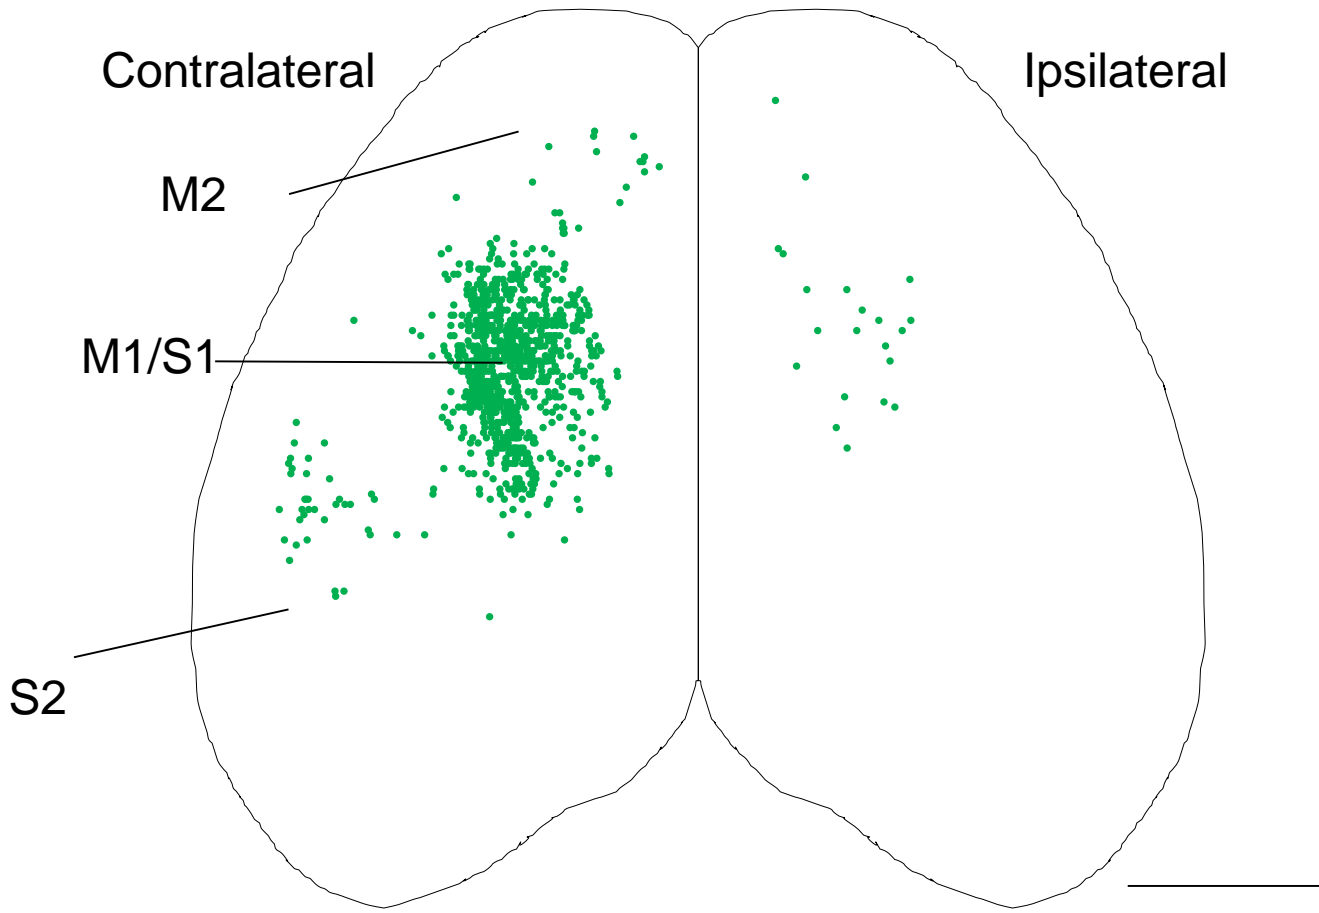

**Supplementary Fig. S6. Distribution of CM cells in the contralateral and ipsilateral hemispheres of the cerebral cortices of early juveniles.**

Data from 5 animals are plotted. Scale bar, 2 mm

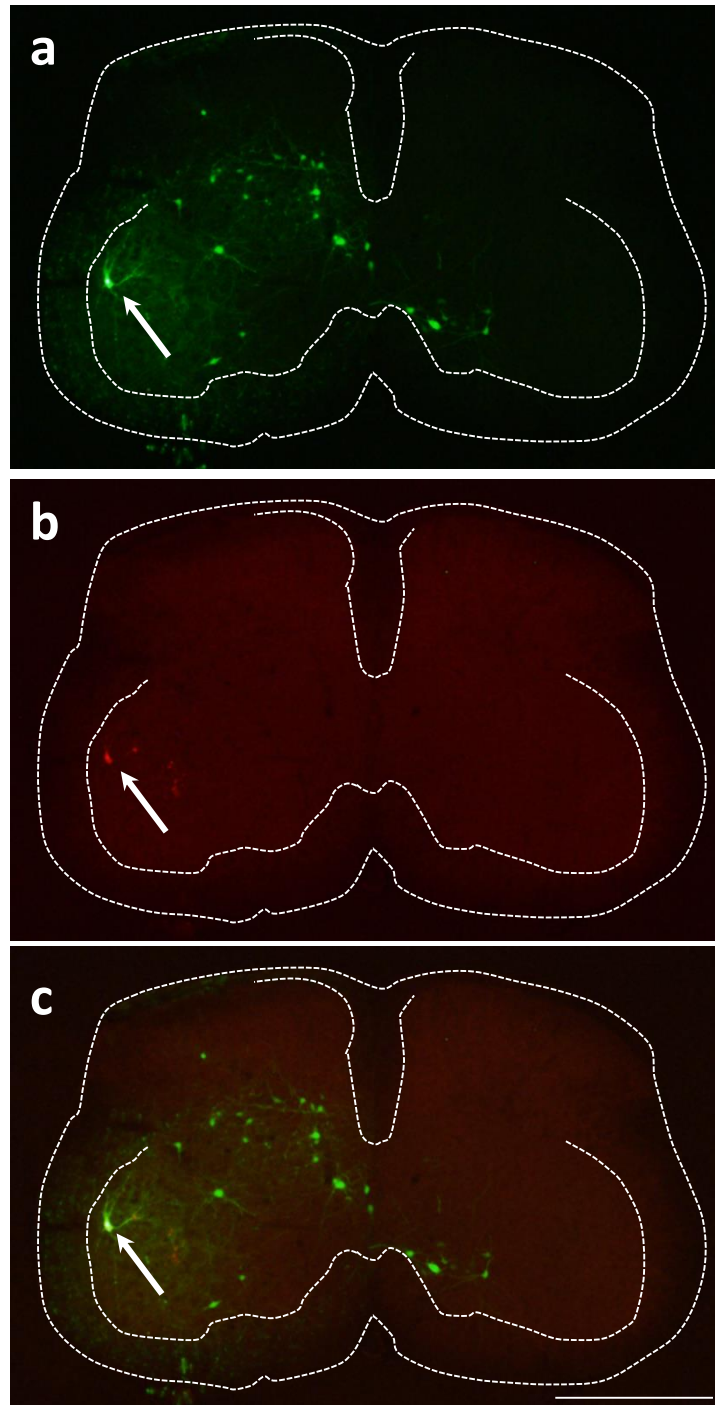

**Supplementary Fig. S7. Monosynaptic tracing from lower-leg muscle MNs.** Lumbar (L4) spinal cord 6 days after intramuscular injections of RV- $\Delta$ G-GFP and AAV6-RFP- $\Delta$ G showing GFP<sup>+</sup> neurons (a), a RFP<sup>+</sup> neuron indicative of a starter MN (arrow) (b). (c) Merged image. GFP<sup>+</sup> and RFP<sup>-</sup> neurons were transsynaptically labeled. Outline of the spinal cord and gray matter were shown in dotted line. Scale bar, 500  $\mu$ m. Animals were received intramuscular injection of RV- $\Delta$ G-GFP and AAV6-RFP-f2A-G on P8 and sacrificed on P14.



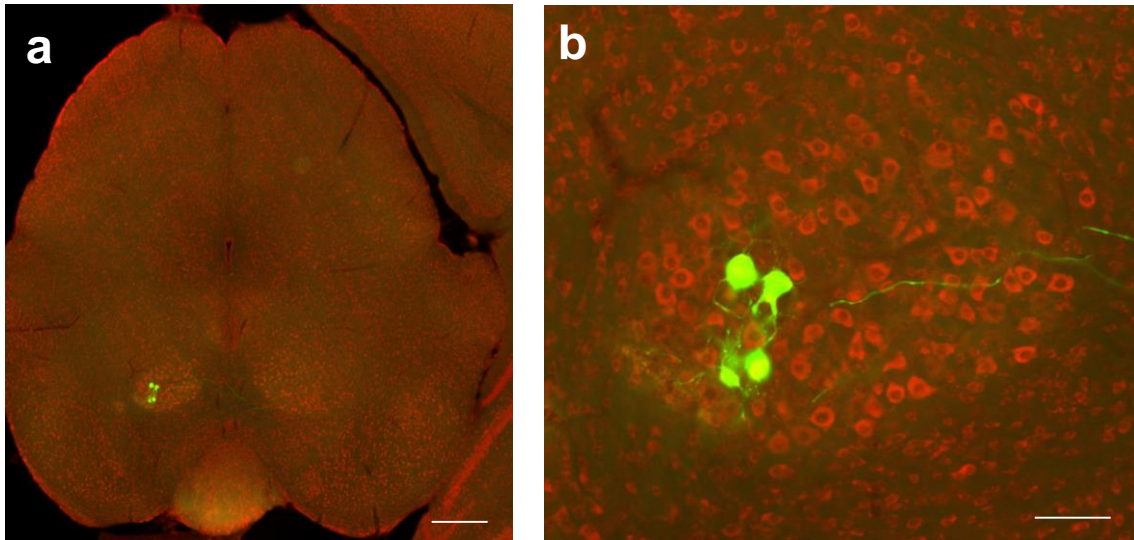

**Supplementary Fig. S8. Example of transsynaptically labeled-neurons in the midbrain from the lower-leg MNs.**

**(a)** Contralateral red nucleus containing transsynaptically labeled neurons. **(b)** High power view of the contralateral red nucleus. Red, a fluorescent Nissl staining by Neurotrace Red. Animals were received intramuscular injection of RV- $\Delta$ G-GFP and AAV6-RFP-f2A-G on P8 and sacrificed on P18. Scale bars indicate 500  $\mu$ m in **a** and 100  $\mu$ m in **b**, respectively.

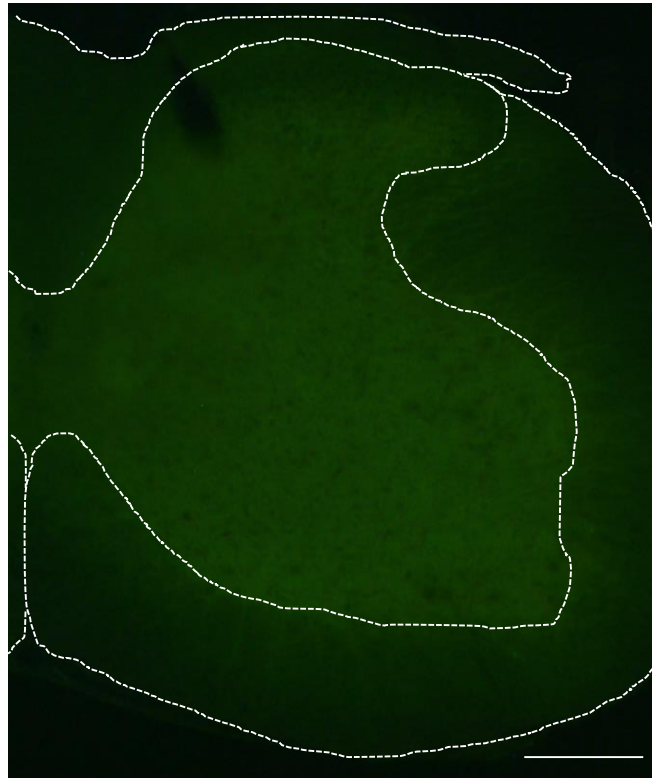

**Supplementary Fig. S9. EnvA-pseudotyped rabies virus cannot infect spinal cord neurons in mice.**

Intraspinal injection of EnvA-RV- $\Delta$ G-GFP alone (without intramuscular injections of AAVs expressing TVA and G protein) produced no GFP-labeled cells in the cervical cord. EnvA-RV- $\Delta$ G-GFP was injected on P18 and animals were sacrificed on P22.

Bar, 200  $\mu$ m.

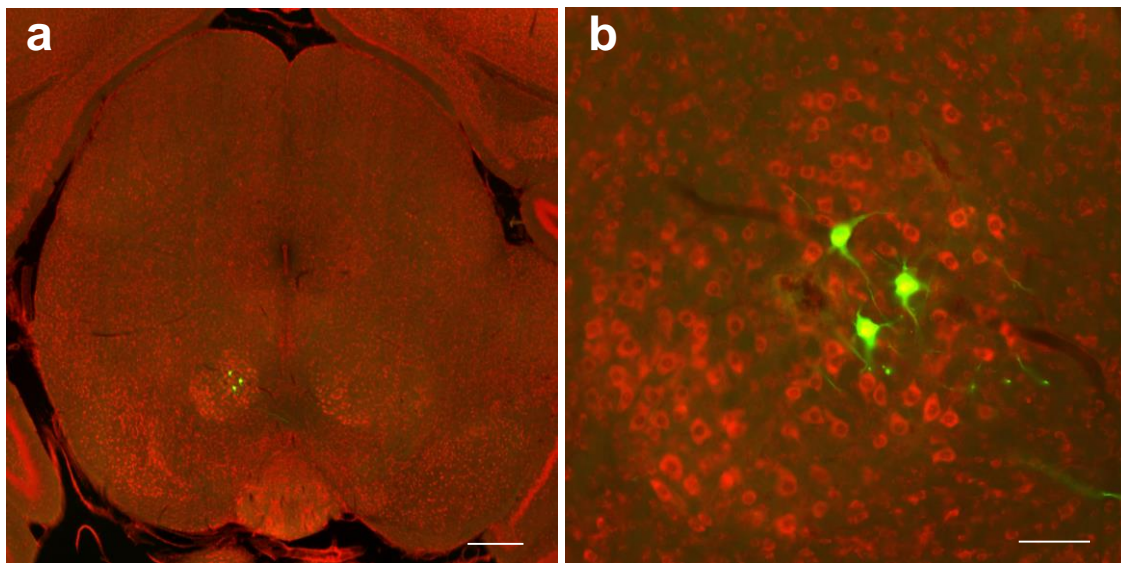

**Supplementary Fig. S10. Transsynaptically labeled neurons from forearm MNs in the contralateral red nucleus of a P26 mouse.**

(a) Contralateral red nucleus containing transsynaptically labeled neurons on P26.

(b) High power view of the labeled cells. Red, a fluorescent Nissl staining by Neurotrace Red. Scale bars indicate 500  $\mu\text{m}$  in **a** and 100  $\mu\text{m}$  in **b**, respectively.

Animals were received intramuscular injection of AAVs expressing TVA, G protein and RFP on P1, and intraspinal injection of envA-RV- $\Delta\text{G}$ -GFP on P18 and sacrificed on P26.

Supplementary Table S1. Experimental animals

| Exps                                                | AAV injection(s) |      | Rabies injection    |      | Survival time <sup>1</sup><br>(days) | Age for fixation | The number of animals |
|-----------------------------------------------------|------------------|------|---------------------|------|--------------------------------------|------------------|-----------------------|
|                                                     | Age              | Site | Age                 | Site |                                      |                  |                       |
| Choline esterase histochemistry                     |                  |      |                     |      |                                      |                  |                       |
| -                                                   | -                | -    | -                   | -    | -                                    | P2               | 1                     |
| -                                                   | -                | -    | -                   | -    | -                                    | P4               | 1                     |
| -                                                   | -                | -    | -                   | -    | -                                    | P6               | 1                     |
| -                                                   | -                | -    | -                   | -    | -                                    | P7               | 7                     |
| -                                                   | -                | -    | -                   | -    | -                                    | P10              | 2                     |
| -                                                   | -                | -    | -                   | -    | -                                    | P14              | 1                     |
| -                                                   | -                | -    | -                   | -    | -                                    | P49              | 1                     |
| Monosynaptic tracing                                |                  |      |                     |      |                                      |                  |                       |
| P5                                                  | FM <sup>2</sup>  | P5   | FM                  | 9    | P14                                  | 3                |                       |
| P6                                                  | FM               | P6   | FM                  | 8    | P14                                  | 2                |                       |
| P7                                                  | FM               | P7   | FM                  | 7    | P14                                  | 3                |                       |
| P8                                                  | LM <sup>3</sup>  | P8   | LM                  | 6    | P14                                  | 2                |                       |
| P8                                                  | LM               | P8   | LM                  | 10   | P18                                  | 5                |                       |
| P22                                                 | FM               | P22  | C5-Th1 <sup>4</sup> | 6    | P28                                  | 4                |                       |
| P1                                                  | FM               | P18  | C5-Th1              | 4    | P22                                  | 2                |                       |
| P1                                                  | FM               | P18  | C5-Th1              | 8    | P26                                  | 5                |                       |
| Control experiments related to monosynaptic tracing |                  |      |                     |      |                                      |                  |                       |
| -                                                   | -                | P7   | FM                  | 7    | P14                                  | 3                |                       |
| -                                                   | -                | P18  | C5-Th1              | 4    | P22                                  | 3                |                       |

<sup>1</sup>Period from rabies injection to fixation

<sup>2</sup>forearm muscles

<sup>3</sup>lower-leg muscles

<sup>4</sup>Spinal cord between the fifth cervical and first thoracic segments
